# Supplementary material for: Histone Demethylase UTX Compromises Articular Chondrocyte Anabolism and Aggravates Osteoarthritic Degeneration
Source: Research Square preprint supplement (doi:10.21203/rs.3.rs-467396/v1), 2021-05-18
Supplement: Supplementary file 1 [file b3162c812a017a9bbcacba11.docx]

**Supplementary Table 1**

**Primers for RT-quantitative PCR and ChIP-PCR assays**

| **Primers for RT-quantitative PCR assays of human specimens** | | |
| --- | --- | --- |
| *UTX* | Forward: 5’-CTTCAGCCATTTCAACAGCA-3’  Reverse: 5’-GCTGAGCTGGGGTATATGGA-3’ |
| 18S *rRNA* | Forward: 5’-GTAACCCGTTGAACCCCATT-3’  Reverse: 5’-CCATCCAATCGGTAGTAGCG-3’ |
| **Primers for RT-quantitative PCR assays of mouse specimens** | | |
| *Utx* (Exon 24) | Forward: 5’-CATCAAGAAAATAACAACTTCTGTTCAGT-3’  Reverse: 5’-AAAACACCCCAGTAGCCTTCAG-3’ |
| *Col2a1* | Forward: 5’- ACTTTCCTCCGTCTACTG-3’  Reverse: 5’- CCTCATCTCTACATCATTGG-3’ |
| *Acan* | Forward: 5’- CGAGTCAACAGCATCTACC-3’  Reverse: 5’-GAGTCATTGGAGCGAAGG-3’ |
| *Sox9* | Forward: 5’-GAACGAGAGCGAGAAGAG-3’  Reverse: 5’-CTTGAAGATAGCATTAGGAGAG-3’ |
| *Igf-2* | Forward: 5’-AGTCGATGTTGGTGCTTCTC-3’  Reverse: 5’-GACAAACTGAAGCGTGTCAAC-3’ |
| *Wnt10a* | Forward: 5’-GAGAGAGTGCTTTCGCCTAC-3’  Reverse: 5’-ACCGCAAGCCTTCAGTTTA-3’ |
| *Wnt4* | Forward: 5’-CCGGCTTTGTGGCTTTATTC-3’  Reverse: 5’-AGTGTAGAGGAGGGAGAAGAC-3’ |
| *Wnt7a* | Forward: 5’-TTACTGCTGGCACCGTCTGATGTG-3’  Reverse: 5’-TGTCTGCTTCATCCTGAGAAATAATCTCC-3’ |
| *Dkk1* | Forward: 5’- CCAAACCTTCTCCTGTCAGTAA-3’  Reverse: 5’-TCAGCACTCAGAACTTCATCTC-3’ |
| *sFRP1* | Forward: 5’- CAAGCCTCTTGCCACTAGAA -3’  Reverse: 5’- CTGTAGTCAGCGTCTCCTTAAC -3’ |
| 18S *rRNA* | Forward: 5’-GTAACCCGTTGAACCCCATT-3’  Reverse: 5’- CCATCCAATCGGTAGTAGCG-3’ |
| **Primers for ChIP-PCR** | | |
| *Sox9* | Forward: 5’-TCAACCCCGGAGTAGTTTG-3’  Reverse: 5’-GGGGAATCAATGAAAACCAA-3’ |
| *Igf-2* | Forward: 5’-AACAAGGTGCACCGGTTTAG-3’  Reverse: 5’-CCCACCCAGTATGAGCAGAT-3’ |
| *Wnt10a* | Forward: 5’-CACGATGGGGAGAGTTAGGA-3’  Reverse: 5’-CTGCAGGCTGATGACACACT-3’ |
